# Supplementary material for: Patient engagement in preclinical laboratory research: A scoping review
Source: PubMed Central journal article supplement (PMC8318845; doi:10.1016/j.ebiom.2021.103484), 2021-07-17

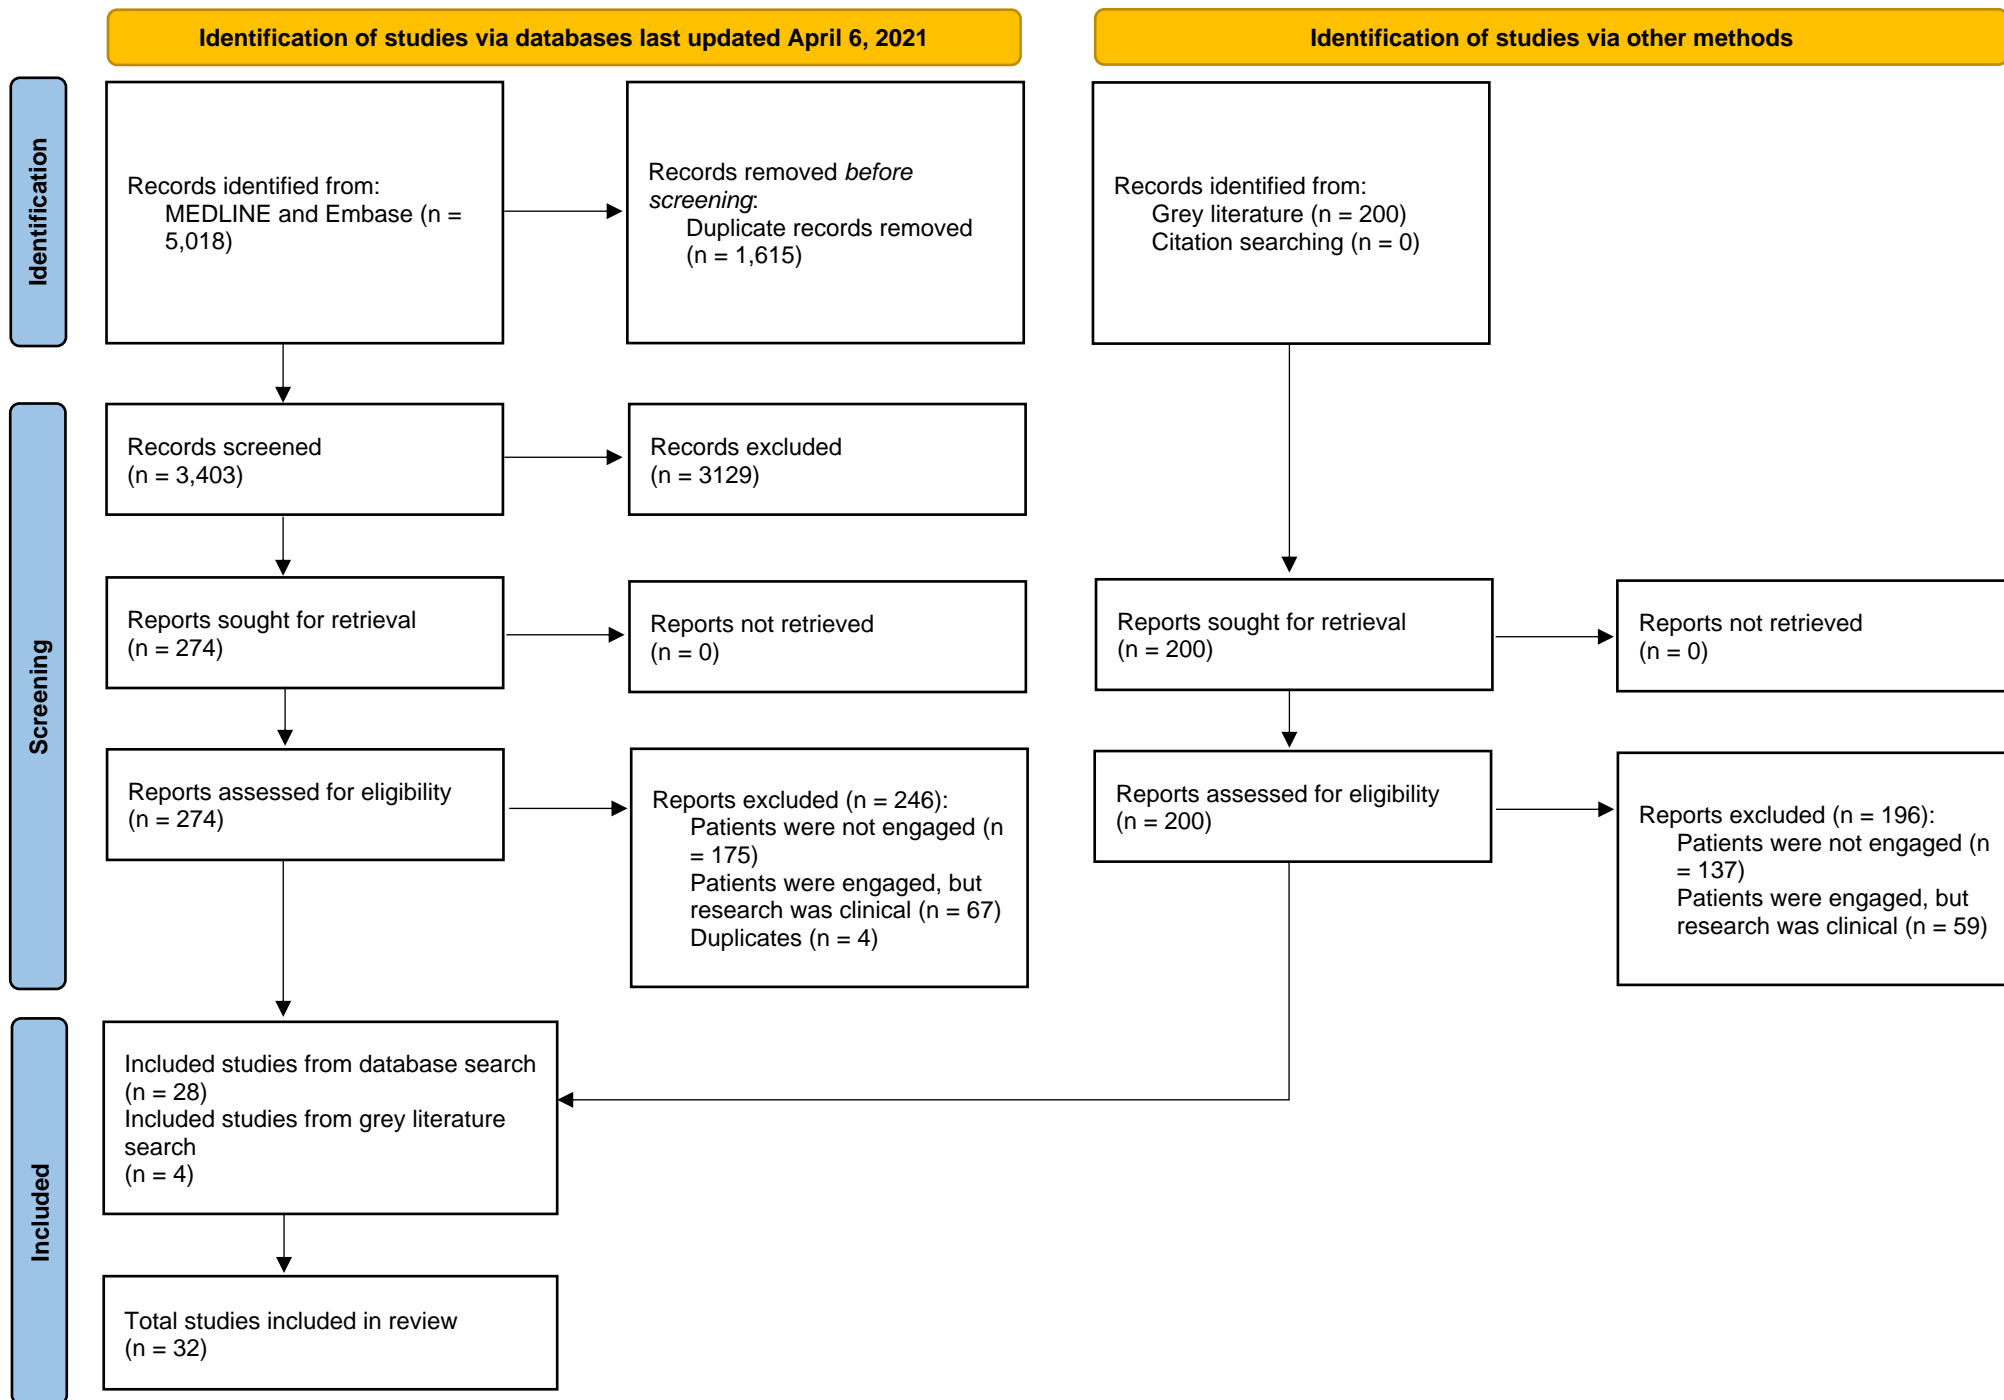

Supplement: mmc3.pdf [file mmc3.pdf]
